# Supplementary material for: HPF1 dynamically controls the PARP1/2 balance between initiating and elongating ADP-ribose modifications
Source: PubMed Central journal article supplement (PMC8602370; doi:10.1038/s41467-021-27043-8), 2021-11-18
Supplement: 41467_2021_27043_MOESM4_ESM.pdf [file 41467_2021_27043_MOESM4_ESM.pdf]

## Reporting Summary

Nature Research wishes to improve the reproducibility of the work that we publish. This form provides structure for consistency and transparency in reporting. For further information on Nature Research policies, see our [Editorial Policies](#) and the [Editorial Policy Checklist](#).

### Statistics

For all statistical analyses, confirm that the following items are present in the figure legend, table legend, main text, or Methods section.

n/a Confirmed

- |                                     |                                     |                                                                                                                                                                                                                                                            |
|-------------------------------------|-------------------------------------|------------------------------------------------------------------------------------------------------------------------------------------------------------------------------------------------------------------------------------------------------------|
| <input type="checkbox"/>            | <input checked="" type="checkbox"/> | The exact sample size ( $n$ ) for each experimental group/condition, given as a discrete number and unit of measurement                                                                                                                                    |
| <input type="checkbox"/>            | <input checked="" type="checkbox"/> | A statement on whether measurements were taken from distinct samples or whether the same sample was measured repeatedly                                                                                                                                    |
| <input type="checkbox"/>            | <input checked="" type="checkbox"/> | The statistical test(s) used AND whether they are one- or two-sided<br><i>Only common tests should be described solely by name; describe more complex techniques in the Methods section.</i>                                                               |
| <input checked="" type="checkbox"/> | <input type="checkbox"/>            | A description of all covariates tested                                                                                                                                                                                                                     |
| <input checked="" type="checkbox"/> | <input type="checkbox"/>            | A description of any assumptions or corrections, such as tests of normality and adjustment for multiple comparisons                                                                                                                                        |
| <input type="checkbox"/>            | <input checked="" type="checkbox"/> | A full description of the statistical parameters including central tendency (e.g. means) or other basic estimates (e.g. regression coefficient) AND variation (e.g. standard deviation) or associated estimates of uncertainty (e.g. confidence intervals) |
| <input type="checkbox"/>            | <input checked="" type="checkbox"/> | For null hypothesis testing, the test statistic (e.g. $F$ , $t$ , $r$ ) with confidence intervals, effect sizes, degrees of freedom and $P$ value noted<br><i>Give <math>P</math> values as exact values whenever suitable.</i>                            |
| <input checked="" type="checkbox"/> | <input type="checkbox"/>            | For Bayesian analysis, information on the choice of priors and Markov chain Monte Carlo settings                                                                                                                                                           |
| <input checked="" type="checkbox"/> | <input type="checkbox"/>            | For hierarchical and complex designs, identification of the appropriate level for tests and full reporting of outcomes                                                                                                                                     |
| <input checked="" type="checkbox"/> | <input type="checkbox"/>            | Estimates of effect sizes (e.g. Cohen's $d$ , Pearson's $r$ ), indicating how they were calculated                                                                                                                                                         |

*Our web collection on [statistics for biologists](#) contains articles on many of the points above.*

### Software and code

Policy information about [availability of computer code](#)

Data collection

Data analysis

For manuscripts utilizing custom algorithms or software that are central to the research but not yet described in published literature, software must be made available to editors and reviewers. We strongly encourage code deposition in a community repository (e.g. GitHub). See the Nature Research [guidelines for submitting code & software](#) for further information.

### Data

Policy information about [availability of data](#)

All manuscripts must include a [data availability statement](#). This statement should provide the following information, where applicable:

- Accession codes, unique identifiers, or web links for publicly available datasets
- A list of figures that have associated raw data
- A description of any restrictions on data availability

Source data are provided with this paper. The HXMS data in this study have been deposited in the Pride database under accession code PXD026580 (<https://www.ebi.ac.uk/pride/archive/projects/PXD026580>). The following structures from the Protein Data Bank ([www.rcsb.org](http://www.rcsb.org)) were used in this study: 4DQY, 2N8A, 6TX3.

## Field-specific reporting

Please select the one below that is the best fit for your research. If you are not sure, read the appropriate sections before making your selection.

Life sciences  Behavioural & social sciences  Ecological, evolutionary & environmental sciences

For a reference copy of the document with all sections, see [nature.com/documents/nr-reporting-summary-flat.pdf](https://www.nature.com/documents/nr-reporting-summary-flat.pdf)

## Life sciences study design

All studies must disclose on these points even when the disclosure is negative.

|                 |                                                                                                                                                                                                                                                                                 |
|-----------------|---------------------------------------------------------------------------------------------------------------------------------------------------------------------------------------------------------------------------------------------------------------------------------|
| Sample size     | No statistical methods were used to determine sample size since no inferences were made from small sample numbers to larger populations. All experiments were repeated two or three times independently to ensure reproducibility, which is the standard practice in the field. |
| Data exclusions | No data were excluded.                                                                                                                                                                                                                                                          |
| Replication     | All experiments were replicated as independent experiments two or three times and yielded reproducible results.                                                                                                                                                                 |
| Randomization   | No randomization was required due to the nature of the study which does not involve human subjects, other organisms or compounds to be tested but rather involves biochemical assays with purified components that could not be randomized.                                     |
| Blinding        | No blinding was implemented. Samples and controls were treated and analyzed following the exact same procedure. The risk of bias is considered limited due to the nature of the experiments performed, and there was no preconceived outcome of the study.                      |

## Reporting for specific materials, systems and methods

We require information from authors about some types of materials, experimental systems and methods used in many studies. Here, indicate whether each material, system or method listed is relevant to your study. If you are not sure if a list item applies to your research, read the appropriate section before selecting a response.

### Materials & experimental systems

| n/a                                 | Involved in the study                                  |
|-------------------------------------|--------------------------------------------------------|
| <input type="checkbox"/>            | <input checked="" type="checkbox"/> Antibodies         |
| <input checked="" type="checkbox"/> | <input type="checkbox"/> Eukaryotic cell lines         |
| <input checked="" type="checkbox"/> | <input type="checkbox"/> Palaeontology and archaeology |
| <input checked="" type="checkbox"/> | <input type="checkbox"/> Animals and other organisms   |
| <input checked="" type="checkbox"/> | <input type="checkbox"/> Human research participants   |
| <input checked="" type="checkbox"/> | <input type="checkbox"/> Clinical data                 |
| <input checked="" type="checkbox"/> | <input type="checkbox"/> Dual use research of concern  |

### Methods

| n/a                                 | Involved in the study                           |
|-------------------------------------|-------------------------------------------------|
| <input checked="" type="checkbox"/> | <input type="checkbox"/> ChIP-seq               |
| <input checked="" type="checkbox"/> | <input type="checkbox"/> Flow cytometry         |
| <input checked="" type="checkbox"/> | <input type="checkbox"/> MRI-based neuroimaging |

## Antibodies

|                 |                                                                                                                                                                                                                                                                                                                                                                                                                                                                                                                                                                                                                                                                                                                                                                   |
|-----------------|-------------------------------------------------------------------------------------------------------------------------------------------------------------------------------------------------------------------------------------------------------------------------------------------------------------------------------------------------------------------------------------------------------------------------------------------------------------------------------------------------------------------------------------------------------------------------------------------------------------------------------------------------------------------------------------------------------------------------------------------------------------------|
| Antibodies used | Mono ADP-ribose binding reagent (MABE 1076, Millipore Sigma). Pan ADP-ribose binding reagent (MABE 1016, Millipore Sigma). Secondary antibody (donkey anti-rabbit conjugated to HRP, Santa Cruz, sc2313)                                                                                                                                                                                                                                                                                                                                                                                                                                                                                                                                                          |
| Validation      | All the antibodies were validated by the Manufacturers by Western Blotting. See images for the each antibody on the Manufacturers website using the links provided. MABE 1076: <a href="https://www.emdmillipore.com/CA/en/product/Anti-mono-ADP-ribose-binding-reagent,MM_NF-MABE1076#overview">https://www.emdmillipore.com/CA/en/product/Anti-mono-ADP-ribose-binding-reagent,MM_NF-MABE1076#overview</a><br>MABE 1016: <a href="https://www.emdmillipore.com/CA/en/product/Anti-pan-ADP-ribose-binding-reagent,MM_NF-MABE1016">https://www.emdmillipore.com/CA/en/product/Anti-pan-ADP-ribose-binding-reagent,MM_NF-MABE1016</a><br>sc2313: <a href="https://www.scbt.com/p/donkey-anti-rabbit-igg-hrp">https://www.scbt.com/p/donkey-anti-rabbit-igg-hrp</a> |
